# Supplementary material for: A styryl-containing aza-BODIPY as a near-infrared dye
Source: Royal Society of Chemistry journal article supplement (doi:10.1039/c4ra10188j), 2014-01-01
Supplement: c4ra10188j1.pdf [file c4ra10188j1.pdf]

## ESI

### A styryl-containing aza-BODIPY as near-infrared dye

**Xin-Dong Jiang, Dongmei Xi, Jiuli Zhao, Haifeng Yu, Guo-Tao Sun and Lin-Jiu Xiao**

|                      |     |
|----------------------|-----|
| 1 General            | S2  |
| 2 Synthesis          | S3  |
| 3 Spectroscopic data | S7  |
| 4 Ms                 | S16 |
| 5 HRMS               | S20 |
| 6 References         | S22 |

## 1 General

The melting points were measured using a SGW® X-4 melting point apparatus. <sup>1</sup>H NMR spectra were recorded on a Bruker AVANCE III 500 MHz spectrometer. <sup>1</sup>H NMR chemical shifts ( $\delta$ ) are given in ppm downfield from Me<sub>4</sub>Si, determined by chloroform ( $\delta = 7.26$  ppm). <sup>13</sup>C NMR spectra were recorded on a Bruker AVANCE III 125 MHz spectrometer. <sup>13</sup>C NMR chemical shifts ( $\delta$ ) are reported in ppm with the internal CDCl<sub>3</sub> at  $\delta 77.0$  ppm as standard. ESI was measured by LCQ Deca XP.

Tetrahydrofuran (THF) was freshly distilled from Na/benzophenone, *n*-hexane was distilled over Na, and other solvents were distilled over CaH<sub>2</sub>. Merck silica gel 60 was used for the column chromatography.

Fluorescence spectra were recorded on F-4600 spectrophotometer. UV/Vis spectra were recorded on UV-2550 spectrophotometer at room temperature. The refractive index of the medium was measured by 2 W Abbe's refractometer at 20 °C.

The fluorescence quantum yields ( $\Phi_f$ ) of the BODIPY systems were calculated using the following relationship (equation 1):

$$\Phi_f = \Phi_{\text{ref}} F_{\text{sampl}} A_{\text{ref}} n_{\text{sampl}}^2 / F_{\text{ref}} A_{\text{sampl}} n_{\text{ref}}^2 \quad (1)$$

Here,  $F$  denotes the integral of the corrected fluorescence spectrum,  $A$  is the absorbance at the excitation wavelength, ref and sampl denote parameters from the reference and unknown experimental samples, respectively. The reference systems used was boronazadipyromethene compound aza-BODIPY ( $\Phi_f = 0.36$  in chloroform).<sup>1</sup>

The MO calculations were performed at the DFT level, and the frontier molecular orbitals of BODIPYs **2a** and **4** at the B3LYP/6-31G(d) level with Gaussian 03.<sup>2</sup>

## 2. Synthesis

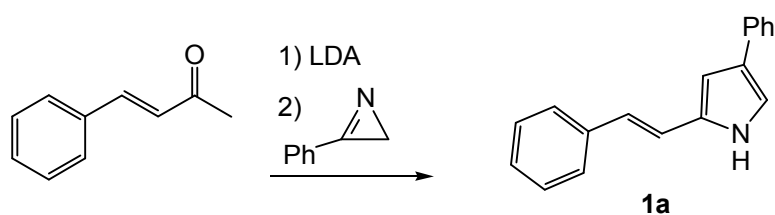

### (E)-4-phenyl-2-styryl-1H-pyrrole **1a**

Under N<sub>2</sub>, LDA (1.0 mmol) in THF (3 mL) was added to (E)-4-phenylbut-3-en-2-one<sup>3</sup> (146 mg, 1.0 mmol) in THF (8 mL) at -78 °C. Then, 3-phenyl-2H-azirine (175 mg, 1.5 mmol) in THF (5 mL) was added and the resulting mixture was stirred for 1 h at the same temperature. The reaction was allowed to warm up to room temperature slowly. It was quenched with water, neutralized with dilute HCl to a pH about 7. The mixture was extracted with CH<sub>2</sub>Cl<sub>2</sub> (2 × 50 mL), and the organic layer was washed with brine (2 × 50 mL) and dried over anhydrous MgSO<sub>4</sub>. After removal of the solvents by evaporation, the resulting crude mixture was separated by column chromatography (*n*-hexane : CH<sub>2</sub>Cl<sub>2</sub> = 1 : 2) to afford **1a** as green solids (110 mg, 45%). <sup>1</sup>H NMR (500 MHz, CDCl<sub>3</sub>): δ (ppm) 8.36 (br s, 1H), 7.54 (d, *J* = 7.5 Hz, 2H), 7.44 (d, *J* = 7.5 Hz, 2H), 7.36 (t, *J* = 7.5 Hz, 2H), 7.34 (t, *J* = 7.5 Hz, 2H), 7.17-7.24 (m, 2H), 7.02-7.11 (m, 1H), 6.98 (d, *J* = 16.5 Hz, 1H), 6.73 (d, *J* = 16.5 Hz, 1H), 6.64-6.67 (m, 1H).

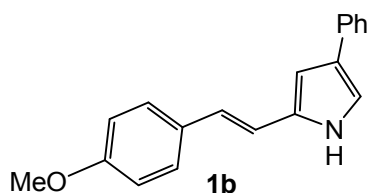

### (E)-2-(4-methoxystyryl)-4-phenyl-1H-pyrrole **1b**

(E)-4-(4-methoxyphenyl)but-3-en-2-one<sup>3</sup> (176 mg, 1.0 mmol) were used as the starting material, and **1b** was obtained as green solids (137 mg, 50%). <sup>1</sup>H NMR (500 MHz, CDCl<sub>3</sub>): δ (ppm) 8.33 (br s, 1H), 7.53 (d, *J* = 7.5 Hz, 2H), 7.37 (t, *J* = 7.5 Hz, 2H), 7.35 (t, *J* = 7.5 Hz, 2H), 7.19 (t, *J* = 7.5 Hz, 1H), 7.07-7.08 (m, 1H), 6.88 (d, *J* =

7.5 Hz, 2H), 6.84 (d,  $J = 16.5$  Hz, 1H), 6.78 (d,  $J = 16.5$  Hz, 1H), 6.61-6.62 (m, 1H), 3.82 (s, 3H).

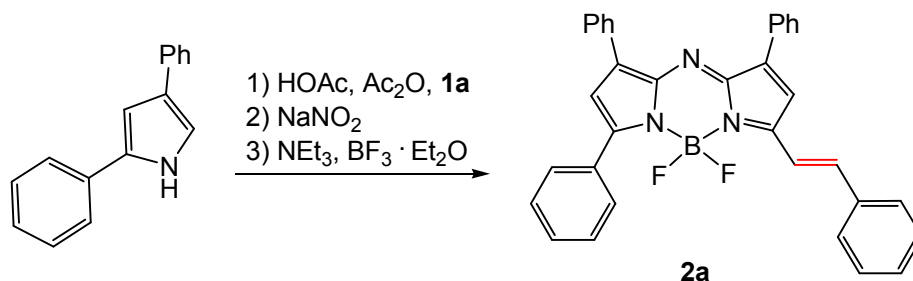

### Styryl-containing aza-BODIPY dye **2a**

Sodium nitrite (6.9 mg, 0.1 mmol) was added to a suspension of 2,4-diphenyl-1H-pyrrole<sup>1</sup> (21.9 mg, 0.1 mmol) in acetic acid (1 mL) at 0 °C, and was stirred for 10 min. The color changed from colorless to brown, then green, and finally brown was observed. The second pyrrole moiety **1a** (24.5 mg, 0.1 mmol) was added, followed by addition of acetic anhydride (0.4 mL). The mixture turned blue immediately. After 0.5 h stirring, the mixture was heated at 80 °C for 0.5 h. Crushed ice was added to the mixture, the resulted blue dye was filtered, washed with water. The blue dye was dissolved in CH<sub>2</sub>Cl<sub>2</sub>, filtered through a pad of alumina (activity III). Solvent was removed under reduced pressure, and the residue was dissolved in dry 1,2-dichloroethane. Triethylamine (0.28 mL, 2.0 mmol) was added, followed by dropwise addition of BF<sub>3</sub>·Et<sub>2</sub>O (0.50 mL, 4.0 mmol) with stirring at room temperature. The mixture was stirred for 0.5 h, then heated in 80 °C for 0.5 h. The reaction was quenched with crushed ice, extracted with CH<sub>2</sub>Cl<sub>2</sub>, and purified by chromatography on silica gel followed by recrystallization from CH<sub>2</sub>Cl<sub>2</sub>/*n*-hexane to afford **2a** (15.7 mg, 30%) as coppery solids. M.p.: 91.0–91.8 °C (decomp.). <sup>1</sup>H NMR (500 MHz, CDCl<sub>3</sub>):  $\delta$  (ppm) 8.05-8.11 (m, 4H), 7.30 (s, 1H), 7.31-7.67 (m, 18H), 7.02 (s, 1H). <sup>13</sup>C NMR (125 MHz, CDCl<sub>3</sub>):  $\delta$  (ppm) 141.4, 135.8, 132.7, 132.0, 131.9, 130.5, 130.4, 129.5, 129.4, 129.3, 129.2, 129.1, 129.0, 128.6, 128.5, 128.4, 128.3, 118.9, 115.5, 48.3, 47.0, 29.6, 18.8, 8.6. MS (ESI(+)):  $m/z = 523.2$  [M]<sup>+</sup>, found 522.9.

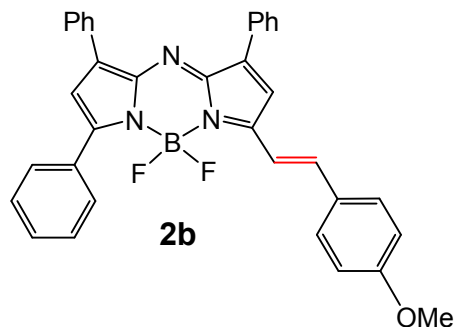

### Styryl-containing aza-BODIPY dye **2b**

Pyrrole **1b** (27.6 mg, 0.1 mmol) were used as the starting material, and BODIPY **2b** was obtained as coppery solids (18.3 mg, 34 %). M.p.: 240.1–241.0 °C (decomp.). <sup>1</sup>H NMR (500 MHz, CDCl<sub>3</sub>): δ (ppm) 8.09 (d, *J* = 7.0 Hz, 4H), 8.09 (d, *J* = 8.5 Hz, 2H), 7.63 (d, *J* = 9.0 Hz, 2H), 7.39–7.57 (m, 11H), 7.30 (s, 1H), 6.99 (s, 1H), 6.94 (d, *J* = 8.5 Hz, 2H), 3.87 (s, 3H). MS (ESI(+)): *m/z* = 553.2 [M]<sup>+</sup>, found 553.8.

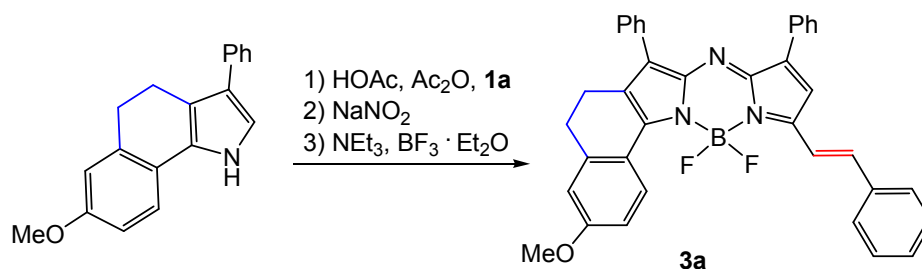

### Styryl-containing aza-BODIPY dye **3a**

Sodium nitrite (6.9 mg, 0.1 mmol) was added to a suspension of 7-methoxy-3-phenyl-4,5-dihydro-1H-benzo[g]indole<sup>4</sup> (27.5 mg, 0.1 mmol) in acetic acid (1 mL) at 0 °C, and was stirred for 10 min. The color changed from colorless to brown, then green, and finally brown was observed. The second pyrrole moiety **1a** (24.5 mg, 0.1 mmol) was added, followed by addition of acetic anhydride (0.4 mL). The mixture turned blue immediately. After 0.5 h stirring, the mixture was heated at 80 °C for 0.5 h. Crushed ice was added to the mixture, the resulted blue dye was filtered, washed with water. The blue dye was dissolved in CH<sub>2</sub>Cl<sub>2</sub>, filtered through a pad of alumina (activity III). Solvent was removed under reduced pressure, and the residue was dissolved in dry 1,2-dichloroethane. Triethylamine (0.28 mL, 2.0 mmol) was added, followed by dropwise addition of BF<sub>3</sub>·Et<sub>2</sub>O (0.50 mL, 4.0 mmol) with stirring at room

temperature. The mixture was stirred for 0.5 h, then heated in 80 °C oil bath for 0.5 h. The reaction was quenched with crushed ice, extracted with CH<sub>2</sub>Cl<sub>2</sub>, and purified by chromatography on silica gel followed by recrystallization from CH<sub>2</sub>Cl<sub>2</sub>/*n*-hexane to afford **3a** (22.0 mg, 38%) as coppery solids. M.p.: 290.2–290.9 °C (decomp.). <sup>1</sup>H NMR (500 MHz, CDCl<sub>3</sub>): δ (ppm) 8.80 (d, *J* = 9.0 Hz, 1H), 8.08 (d, *J* = 7.5 Hz, 2H), 7.66–7.74 (m, 5H), 7.35–7.49 (m, 10H), 7.22 (s, 1H), 7.07 (d, *J* = 7.5 Hz, 1H), 6.87 (s, 1H), 3.93 (s, 3H), 2.97 (s, 4H). <sup>13</sup>C NMR (125 MHz, CDCl<sub>3</sub>): δ (ppm) 162.7, 151.3, 147.2, 144.9, 144.4, 140.2, 138.2, 137.5, 136.4, 132.7, 131.9, 130.4, 129.3, 128.8, 128.7, 128.6, 128.5, 128.4, 128.1, 127.7, 120.0, 119.2, 114.6, 113.2, 55.5, 30.5, 21.7. MS (ESI(+)): *m/z* = 579.2 [M]<sup>+</sup>, found 579.0. HRMS-MALDI (*m/z*): [M+H]<sup>+</sup> calcd for C<sub>37</sub>H<sub>29</sub>BF<sub>2</sub>N<sub>3</sub>O: 580.2372; found 580.2366.

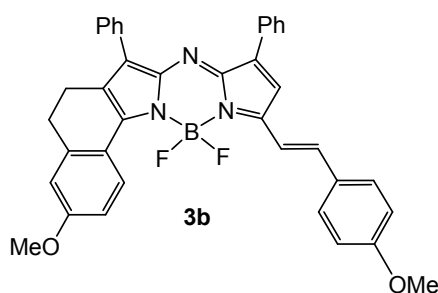

### Styryl-containing aza-BODIPY dye **3b**

Pyrrole **1b** (27.6 mg, 0.1 mmol) were used as the starting material, and BODIPY **3b** was obtained as coppery solids (24.9 mg, 41 %). M.p.: 253.0–253.7 °C (decomp.). <sup>1</sup>H NMR (500 MHz, CDCl<sub>3</sub>): δ (ppm) 8.77 (d, *J* = 9.0 Hz, 1H), 8.08 (d, *J* = 7.5 Hz, 2H), 7.72 (d, *J* = 7.5 Hz, 2H), 7.62 (d, *J* = 8.5 Hz, 2H), 7.51–7.58 (m, 2H), 7.49 (t, *J* = 7.5 Hz, 2H), 7.34–7.45 (m, 4H), 7.21 (s, 1H), 7.05 (dd, *J* = 9.0, 2.5 Hz, 1H), 6.95 (d, *J* = 8.5 Hz, 2H), 6.86 (d, *J* = 2.5 Hz, 1H), 3.92 (s, 3H), 3.86 (s, 3H), 2.95 (s, 4H). <sup>13</sup>C NMR (125 MHz, CDCl<sub>3</sub>): δ (ppm) 162.3, 161.0, 153.3, 152.5, 146.7, 144.7, 144.4, 138.0, 137.6, 132.6, 132.1, 131.4, 130.4, 129.6, 129.3, 128.7, 128.6, 128.4, 128.2, 128.0, 120.3, 117.1, 114.4, 113.5, 113.1, 55.5, 55.4, 30.5, 21.7. MS (ESI(+)): *m/z* = 609.2 [M]<sup>+</sup>, found 609.4. HRMS-MALDI (*m/z*): [M+H]<sup>+</sup> calcd for C<sub>38</sub>H<sub>31</sub>BF<sub>2</sub>N<sub>3</sub>O<sub>2</sub>: 610.2478; found 610.2457.

### 3 Spectroscopic data

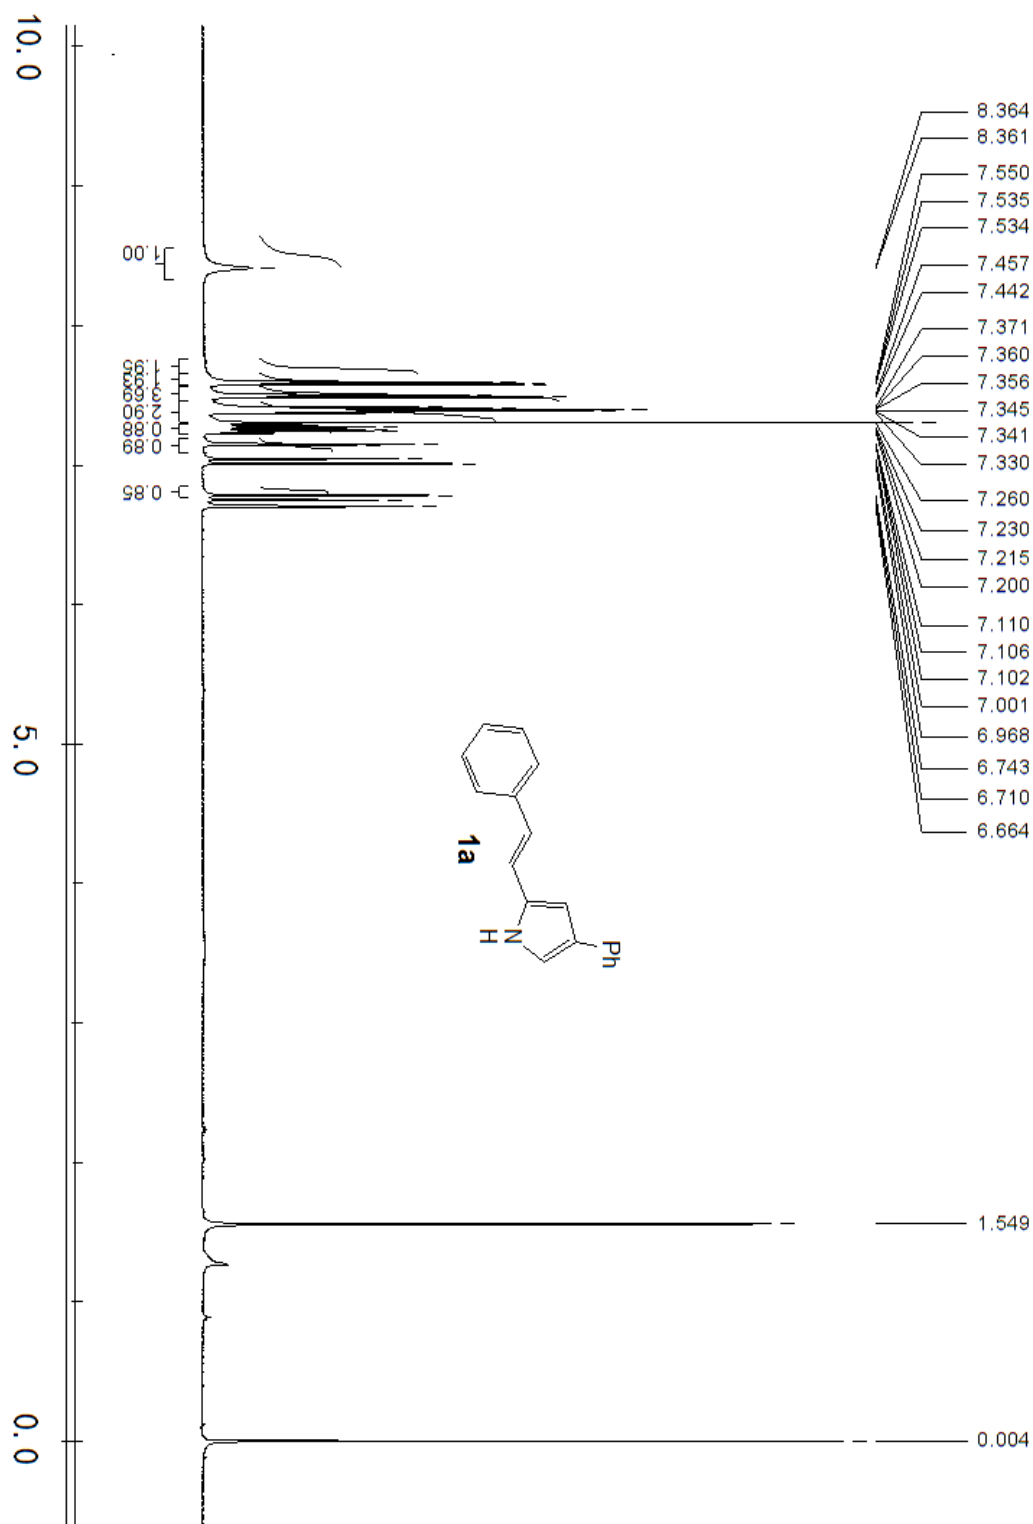

<sup>1</sup>H NMR (500 MHz, CDCl<sub>3</sub>) of dye **1a**

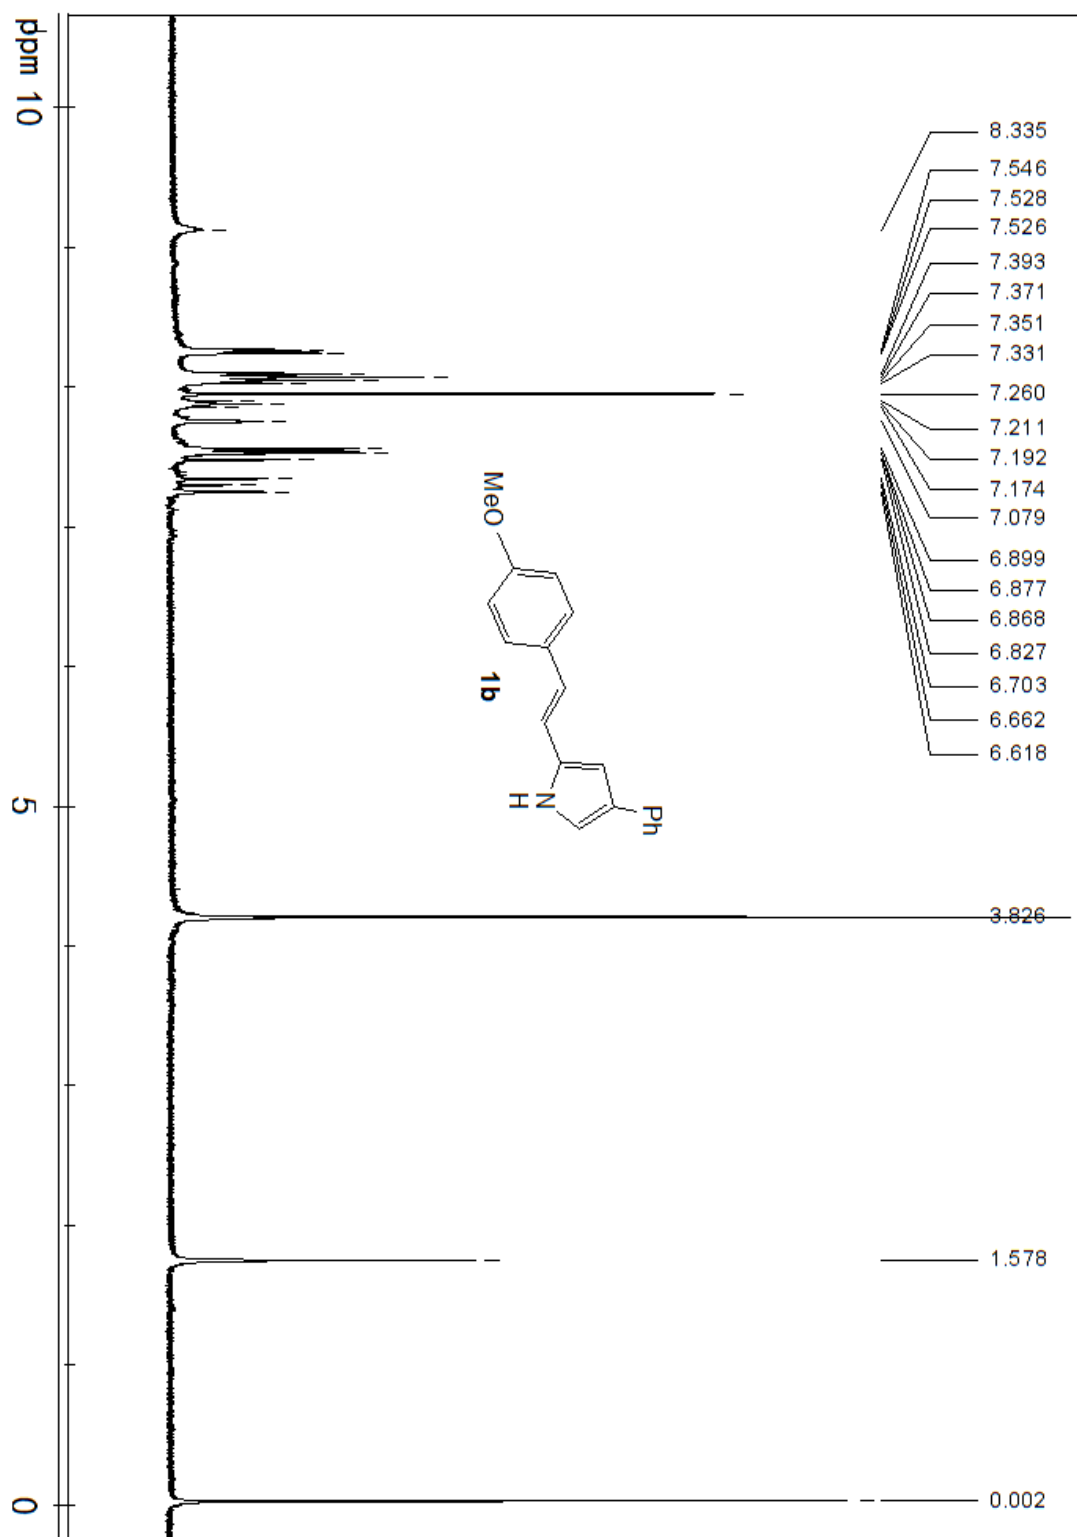

$^1\text{H}$  NMR (500 MHz,  $\text{CDCl}_3$ ) of dye **1b**



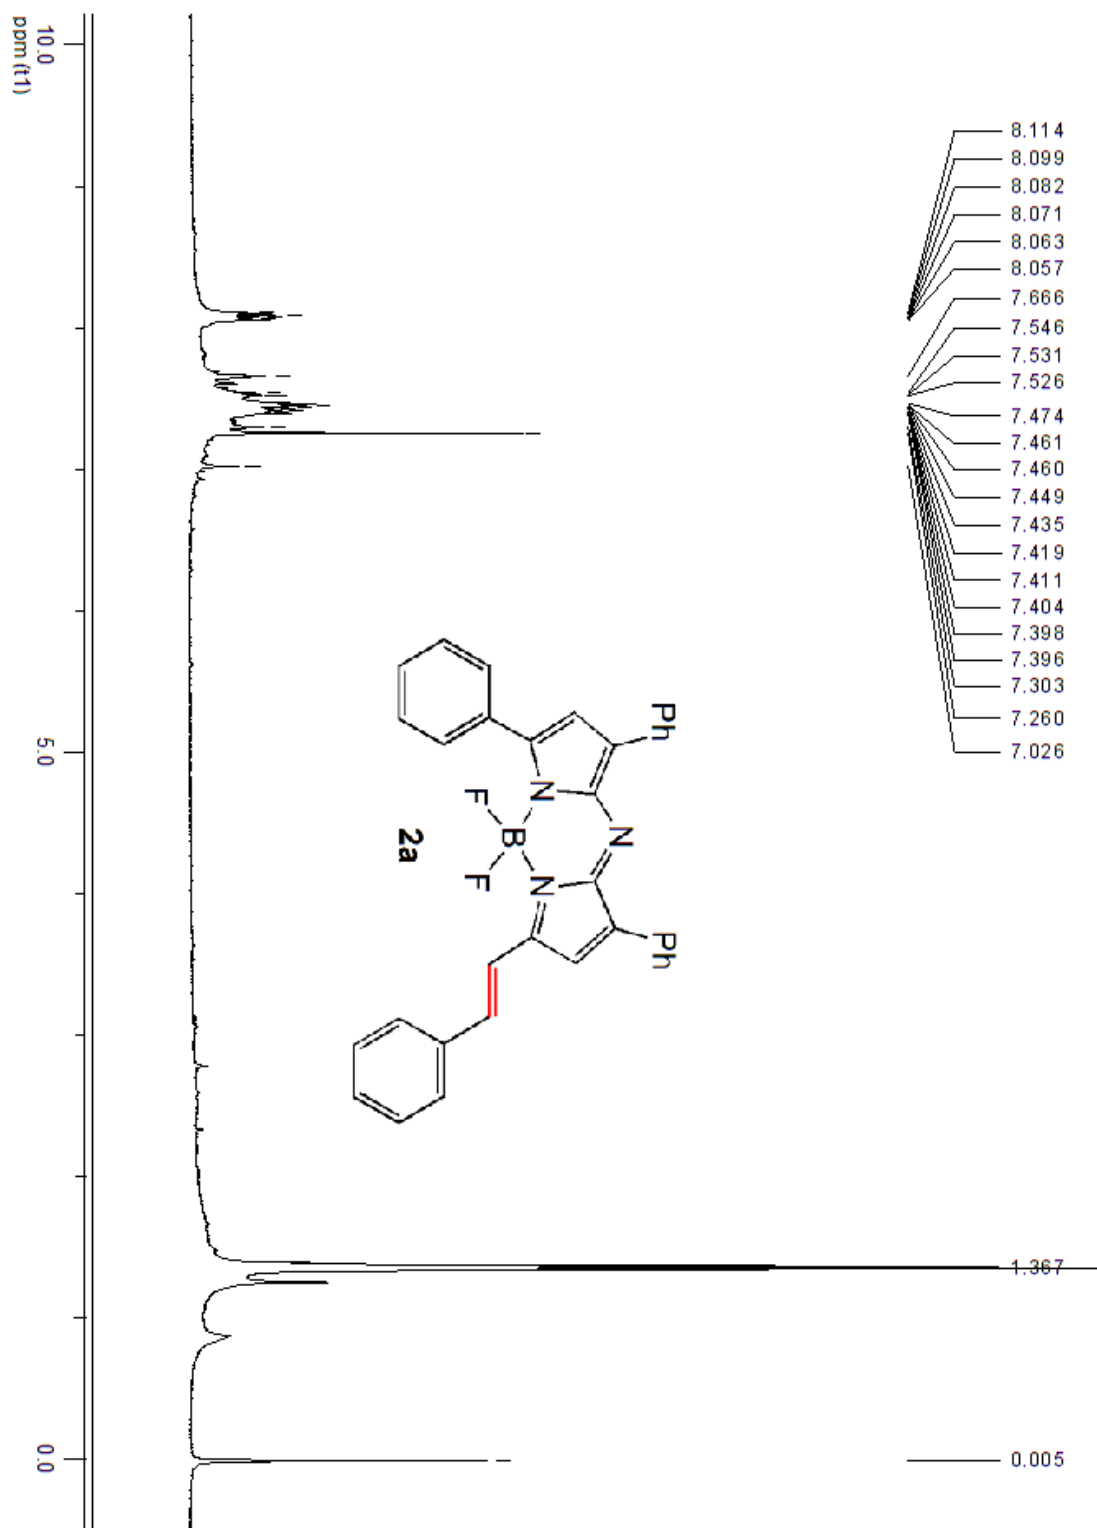

<sup>1</sup>H NMR (500 MHz, CDCl<sub>3</sub>) of dye **2a**

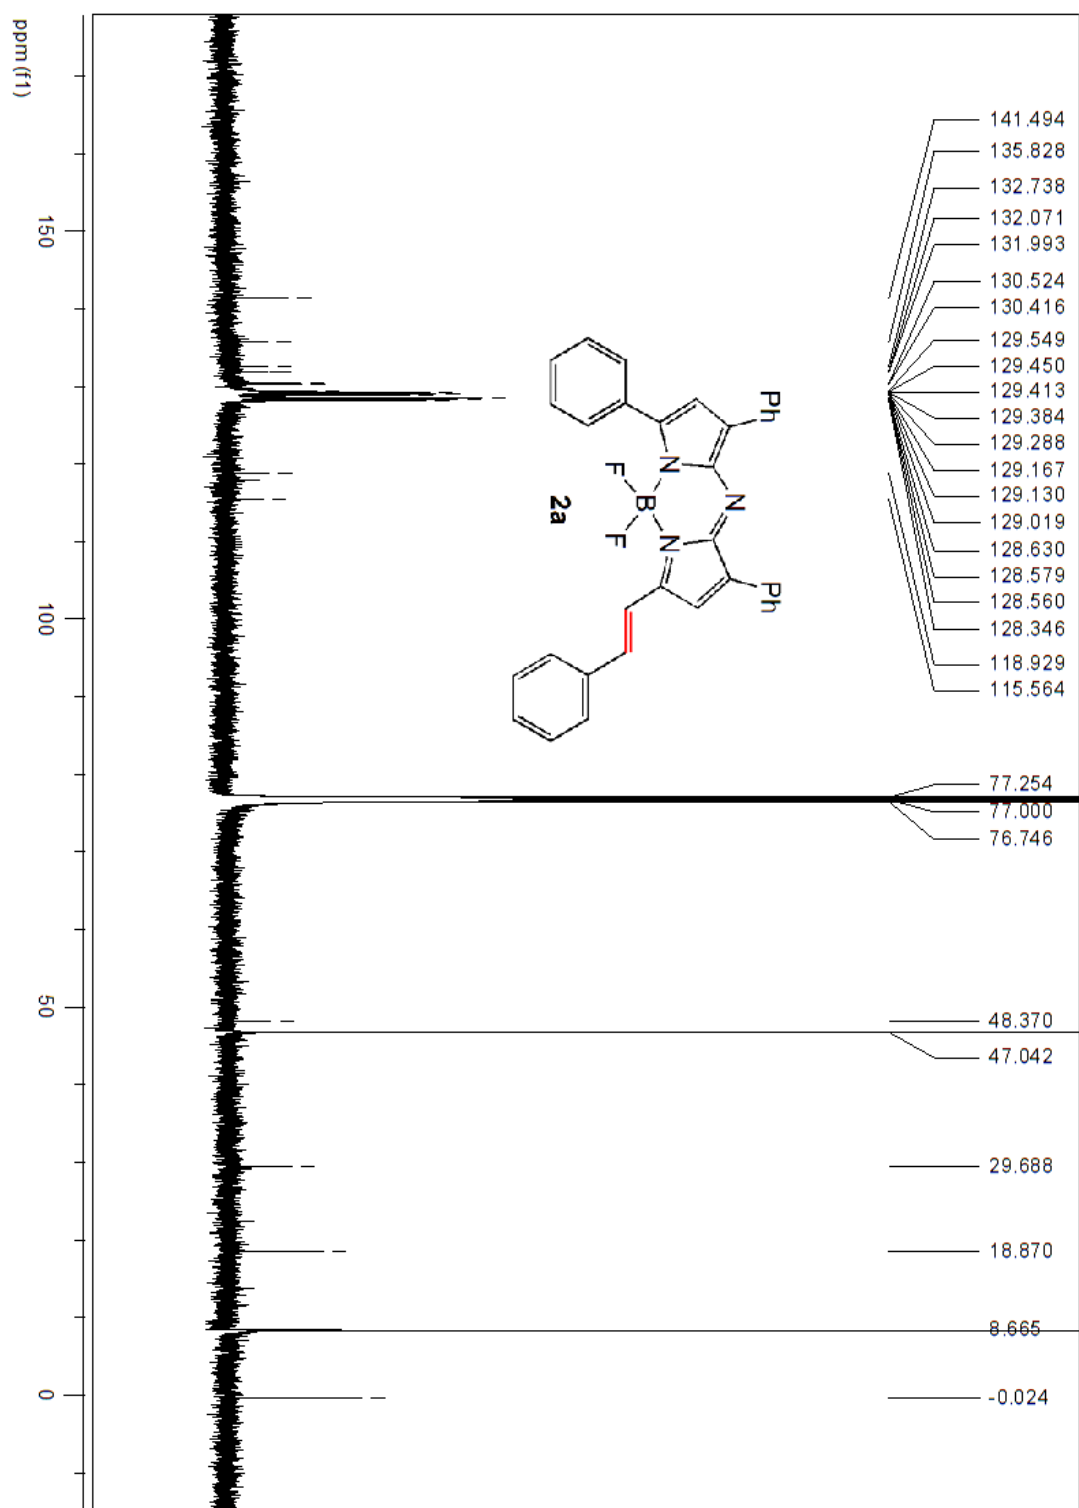

<sup>13</sup>C NMR (125 MHz, CDCl<sub>3</sub>) of dye **2a**

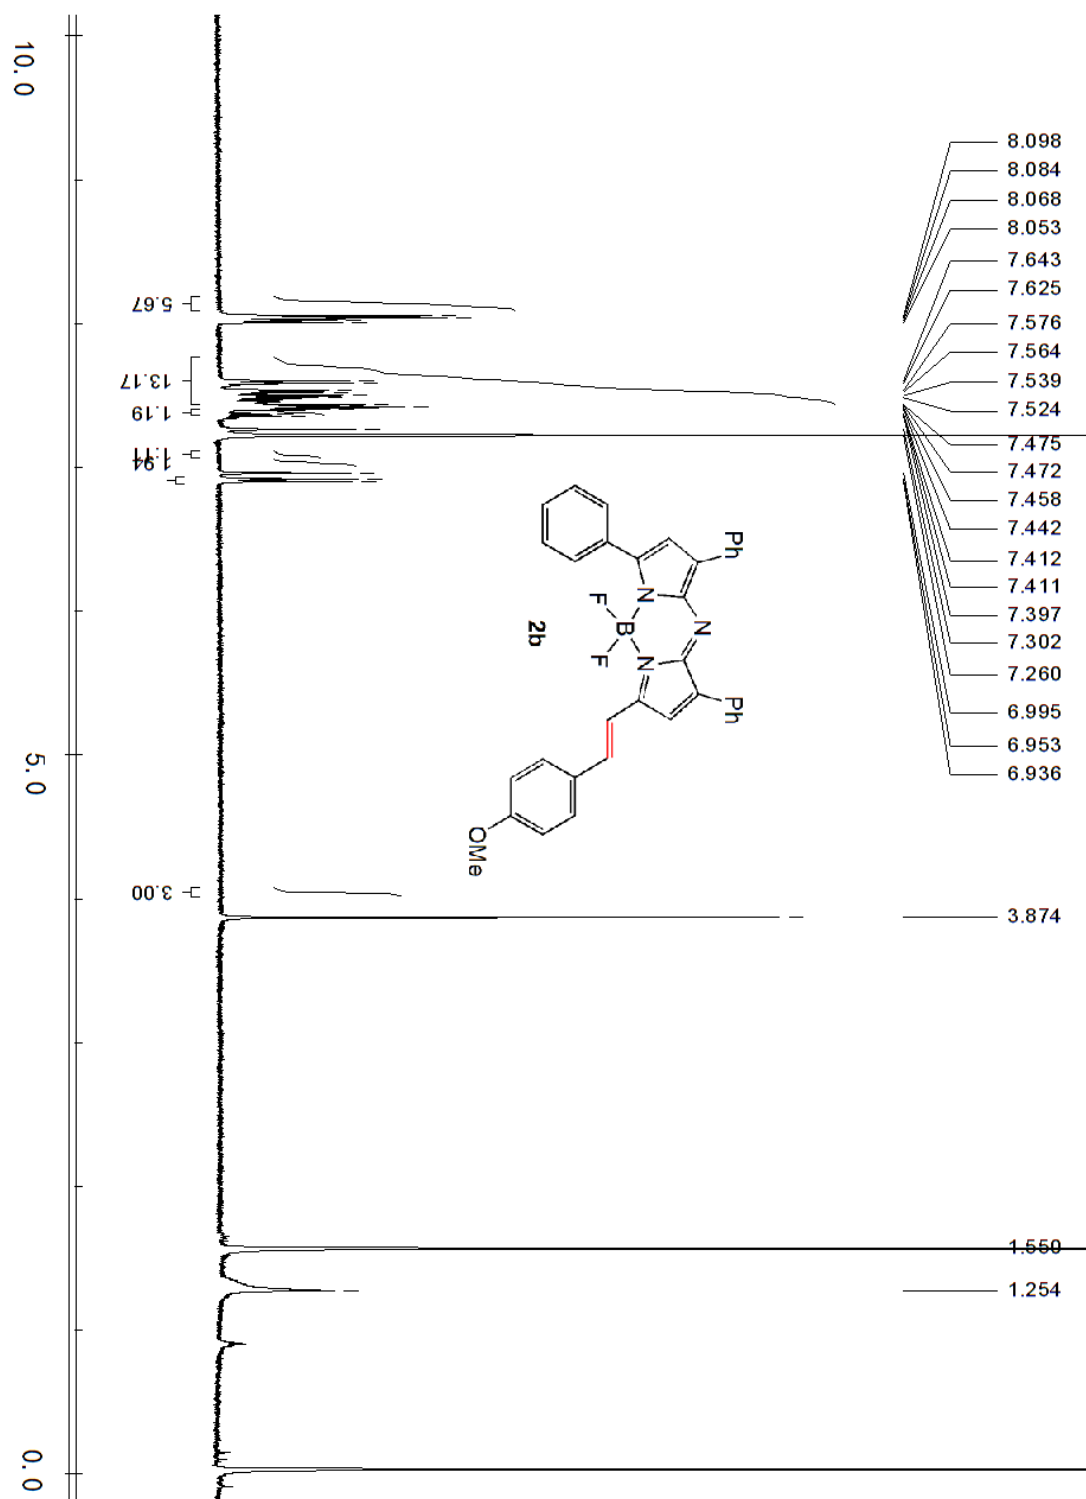

$^1\text{H}$  NMR (500 MHz,  $\text{CDCl}_3$ ) of dye **2b**

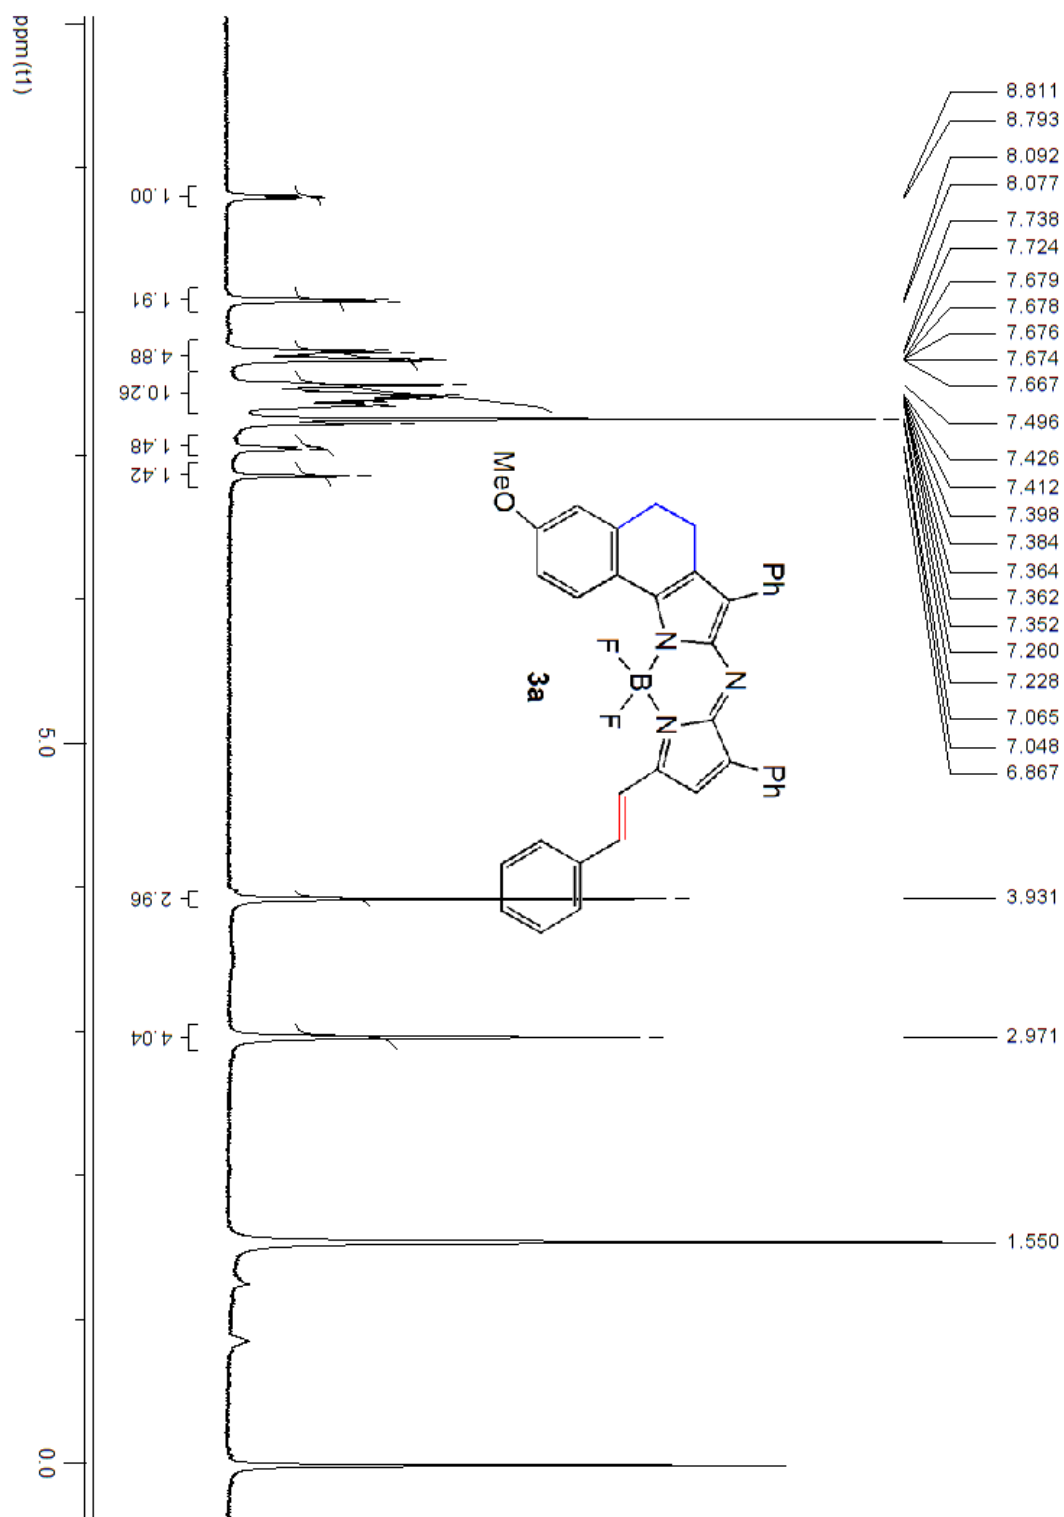

$^1\text{H}$  NMR (500 MHz,  $\text{CDCl}_3$ ) of dye **3a**

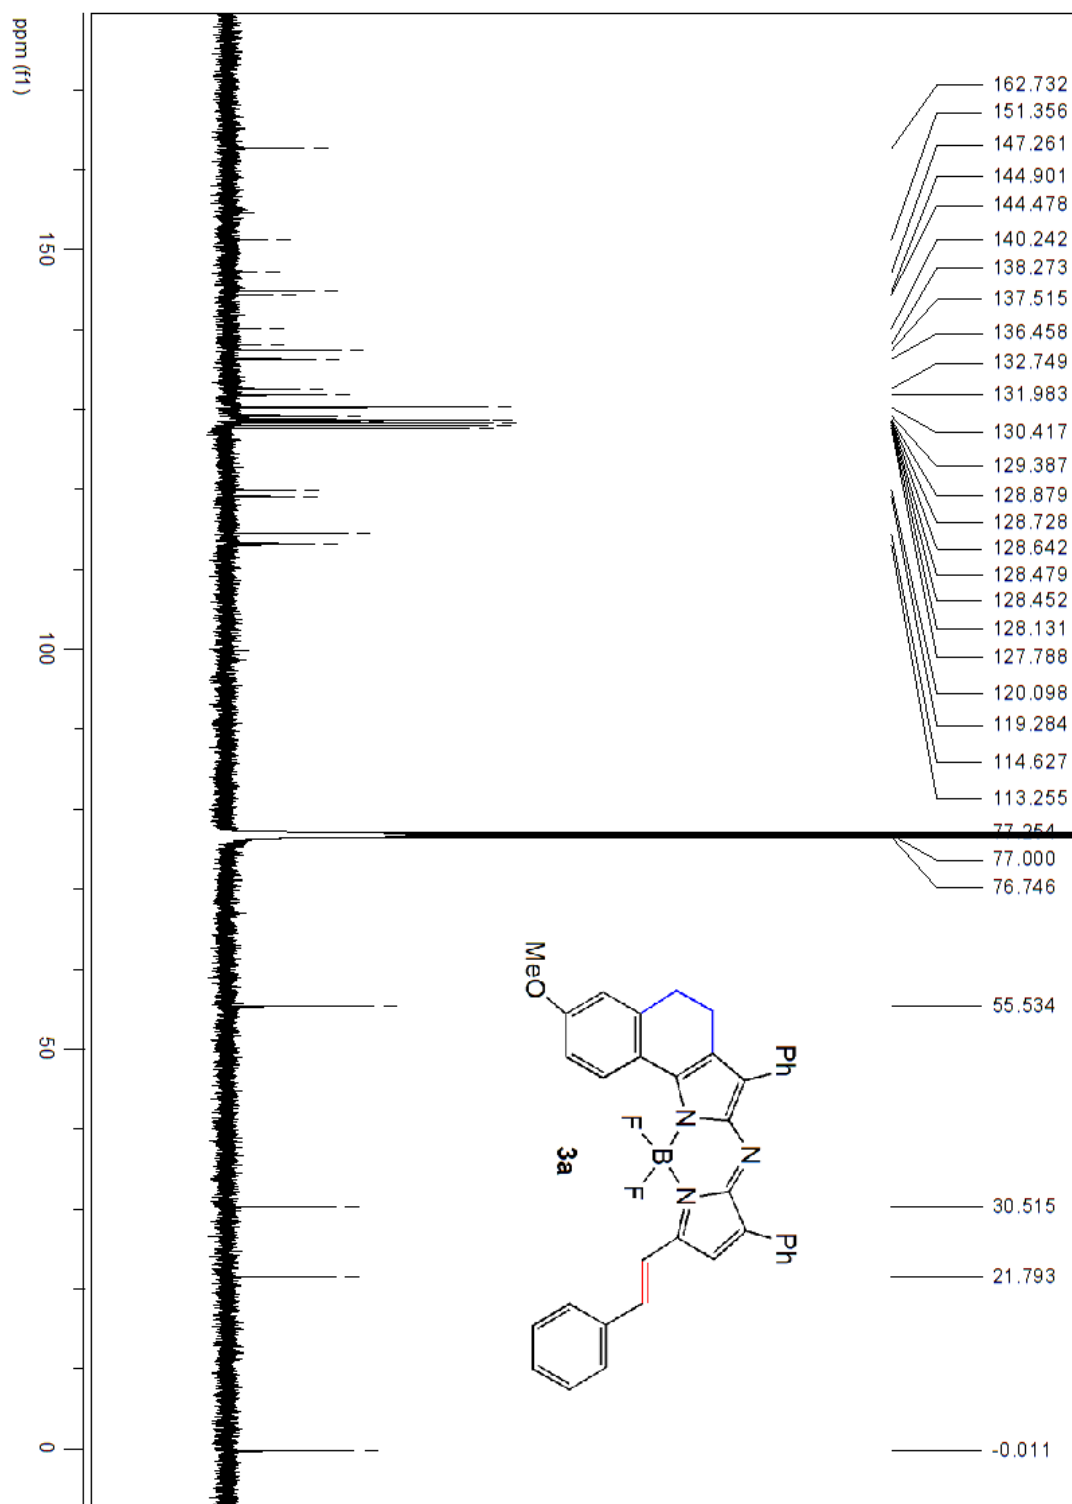

$^{13}\text{C}$  NMR (125 MHz,  $\text{CDCl}_3$ ) of dye **3a**

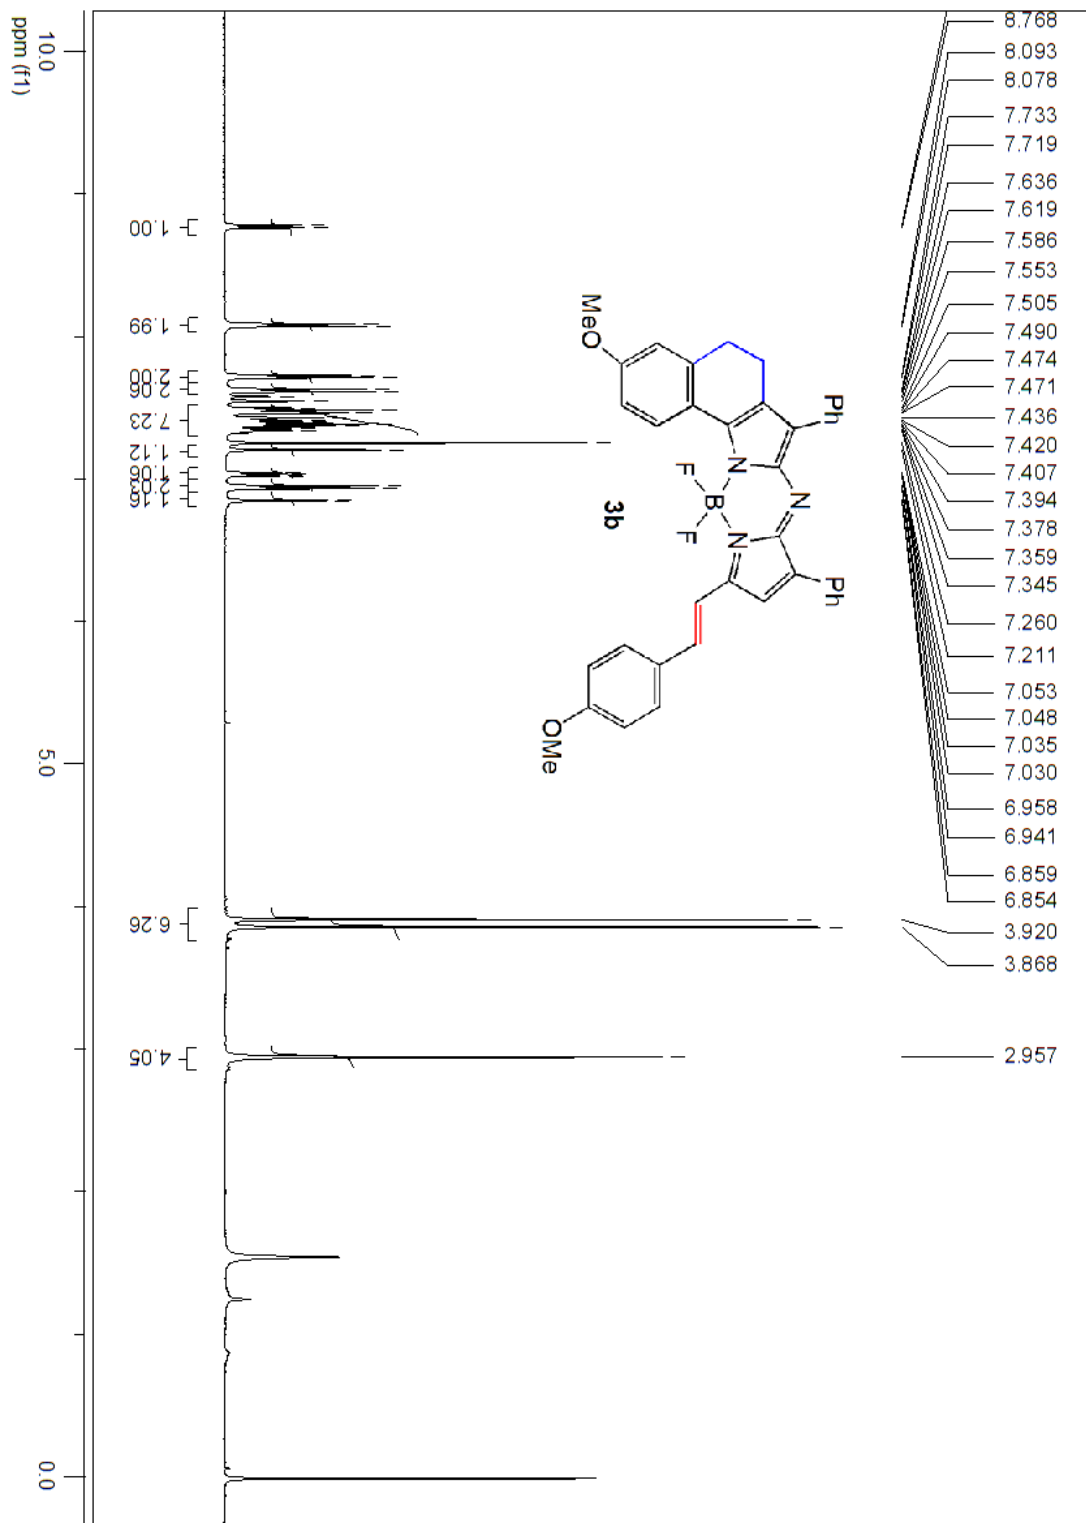

$^1\text{H NMR}$  (500 MHz,  $\text{CDCl}_3$ ) of dye **3b**

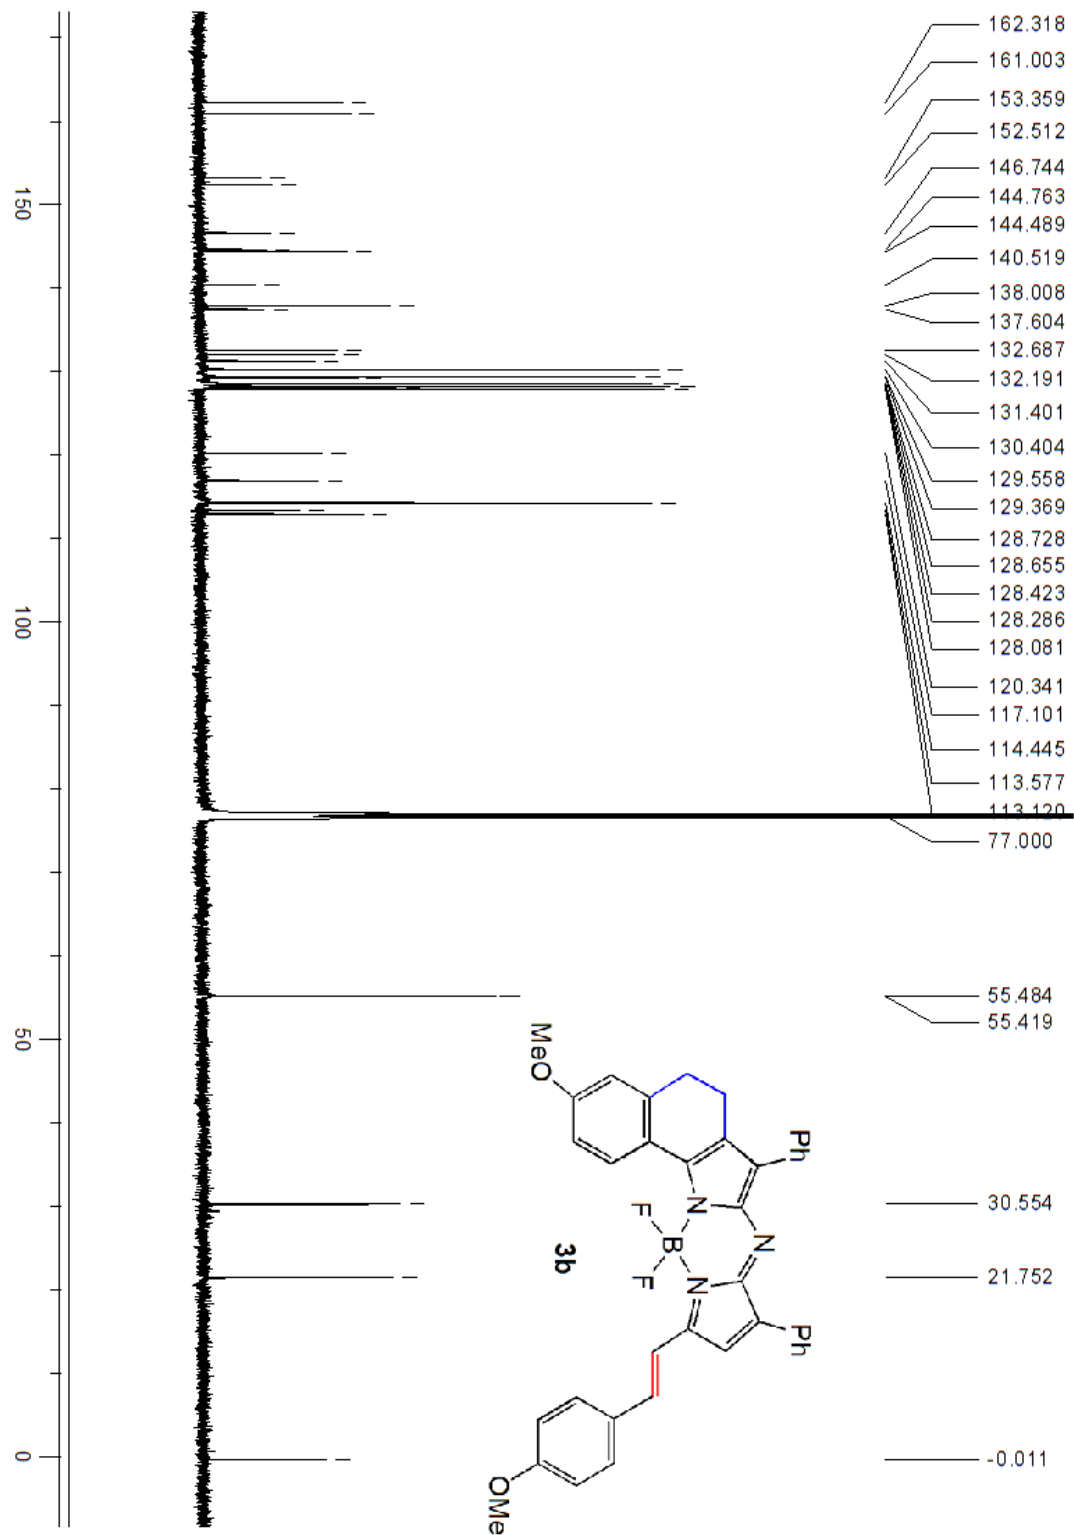

<sup>13</sup>C NMR (125 MHz, CDCl<sub>3</sub>) of dye **3b**

20141029-1#601-607 RT: 8.02-8.10 AV: 7 NL: 1.05E9  
T: + c ESI Full ms [400.00-1250.00]

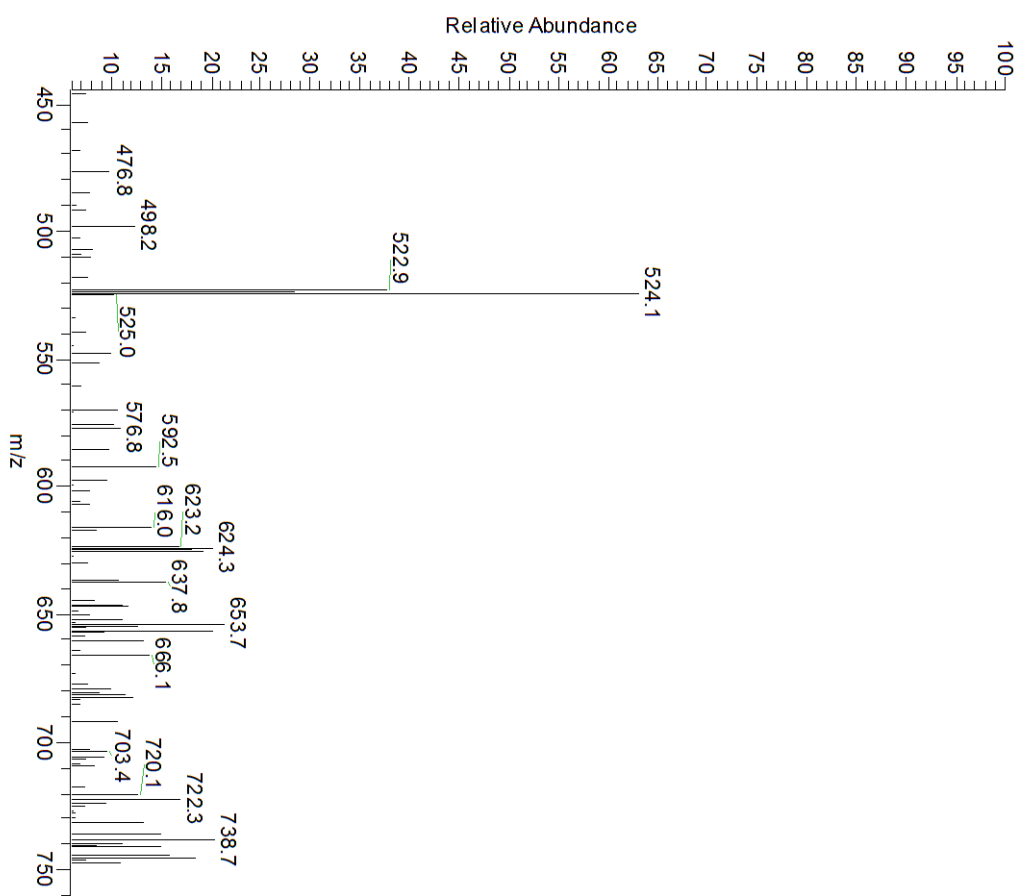

MS (ESI) of **2a**



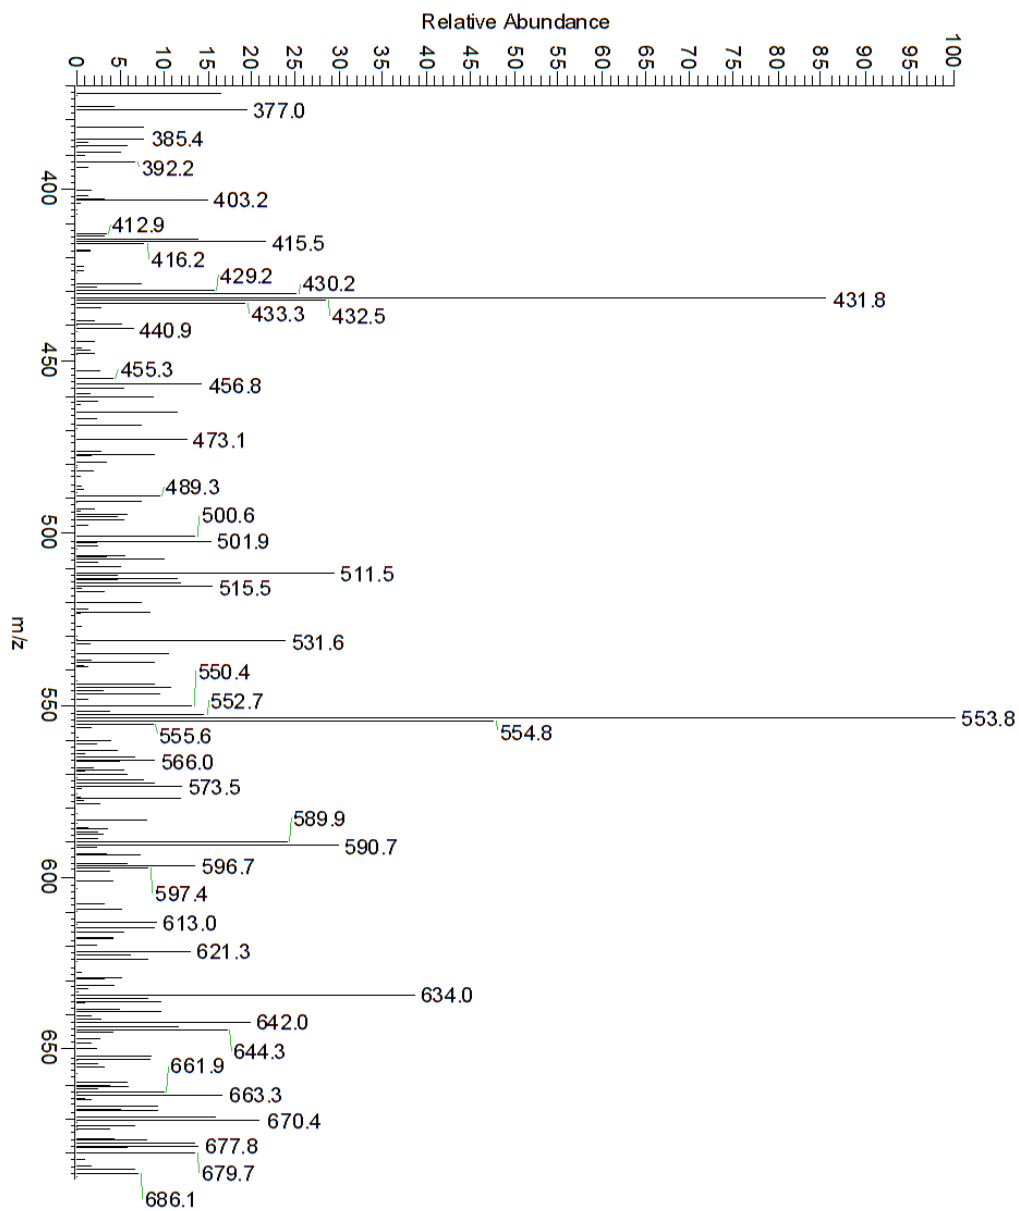

20141022-2#348-353 RT: 4.99-5.06 AV: 6 SB: 5.3.61-3.67 NL: 1.54E8  
T: + c ESI(Full ms [300.00-1300.00])

MS (ESI) of **2b**

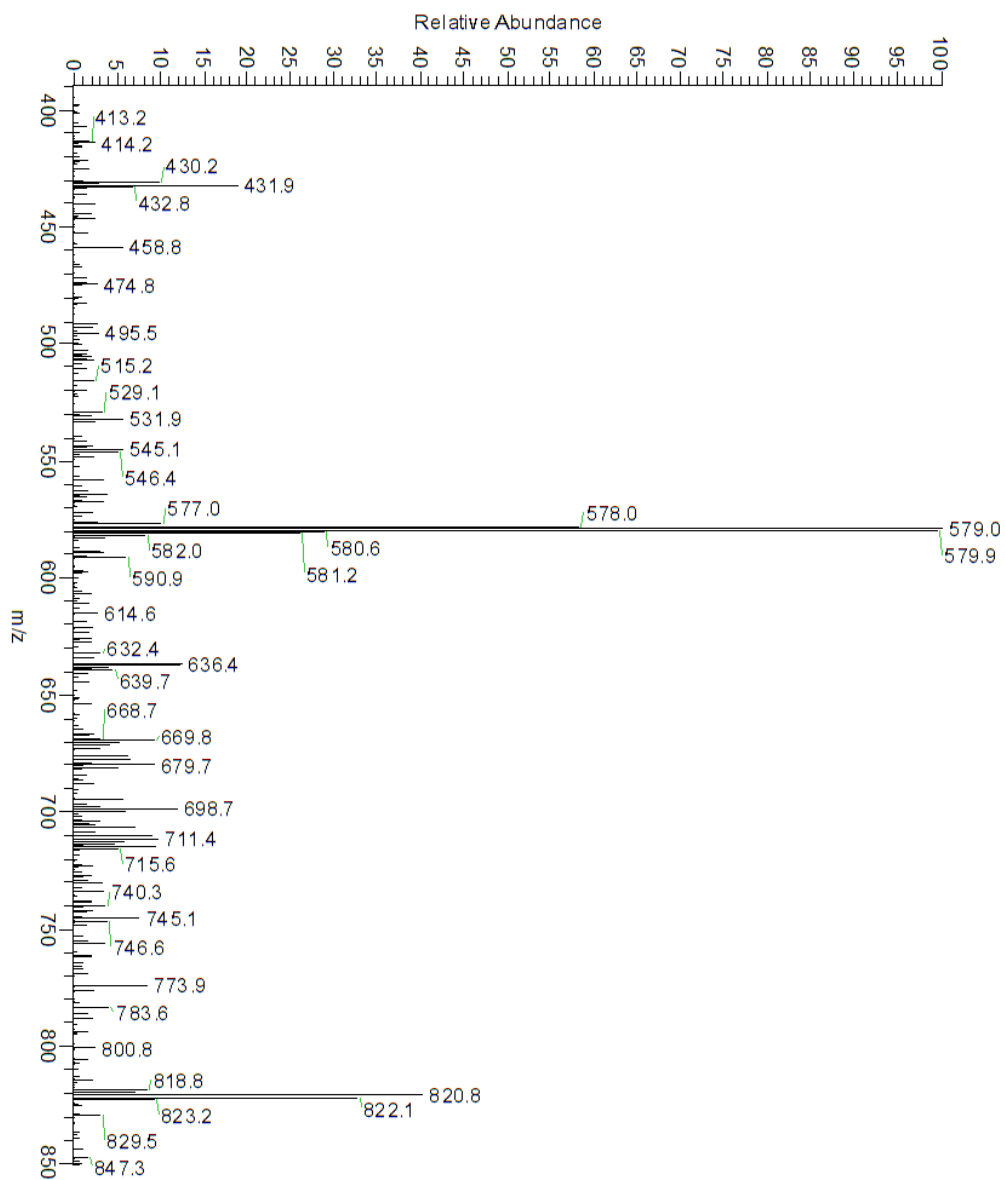

20141022-3-#485-491 RT: 6.97-7.06 AV: 7 SB: 8 2.31-2.41 NL: 8.10E8  
T: + c ESI Full ms [300.00-1300.00]

MS (ESI) of **3a**

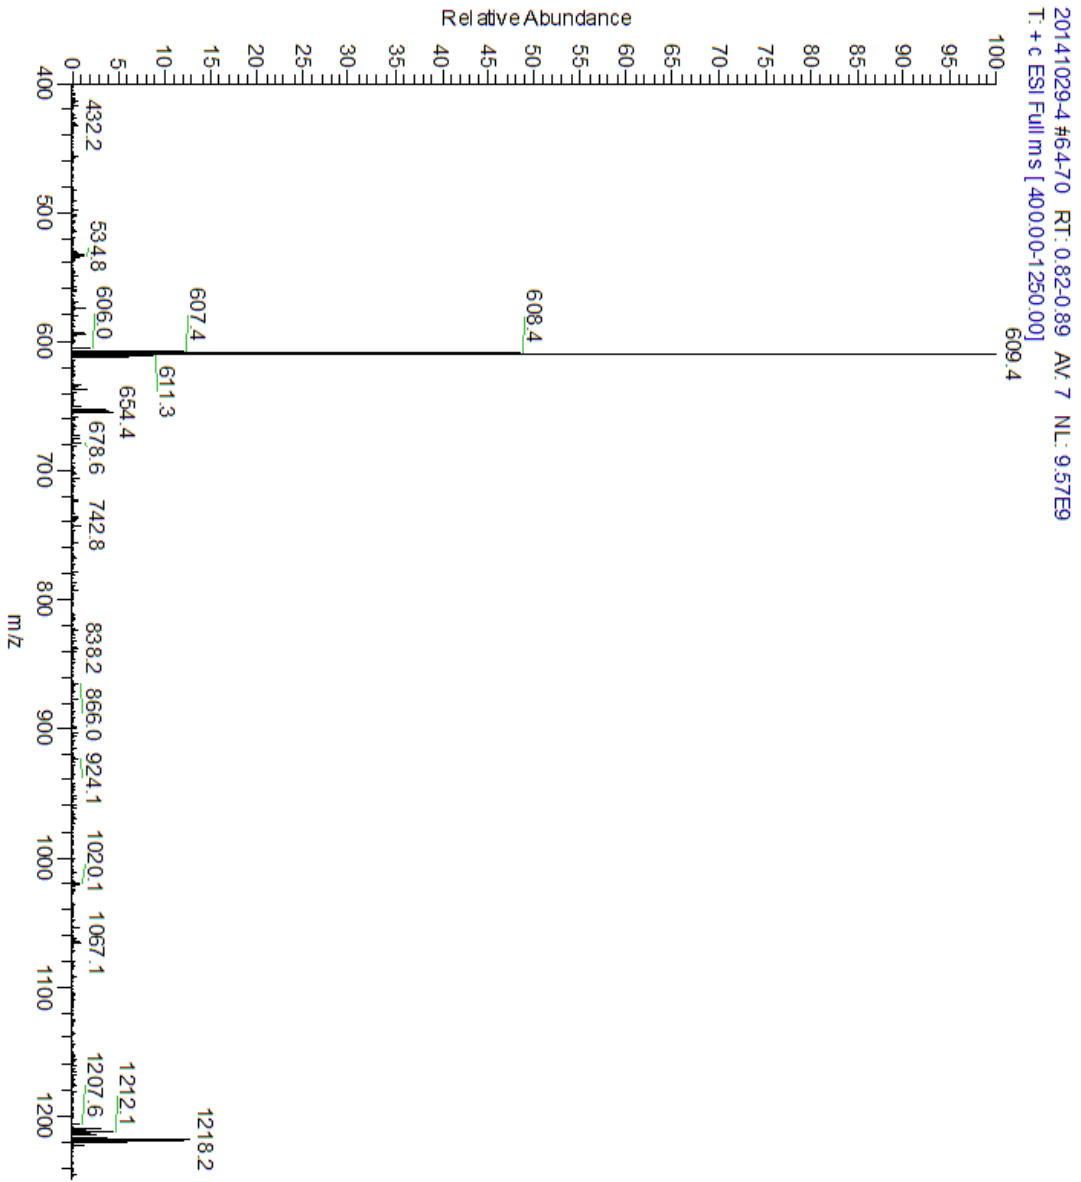

MS (ESI) of **3b**

# Peking University Mass Spectrometry Sample Analysis Report

## Analysis Info

Analysis Name 11010557  
Sample  
Comment ESI Positive

Acquisition Date  
Instrument  
Operator

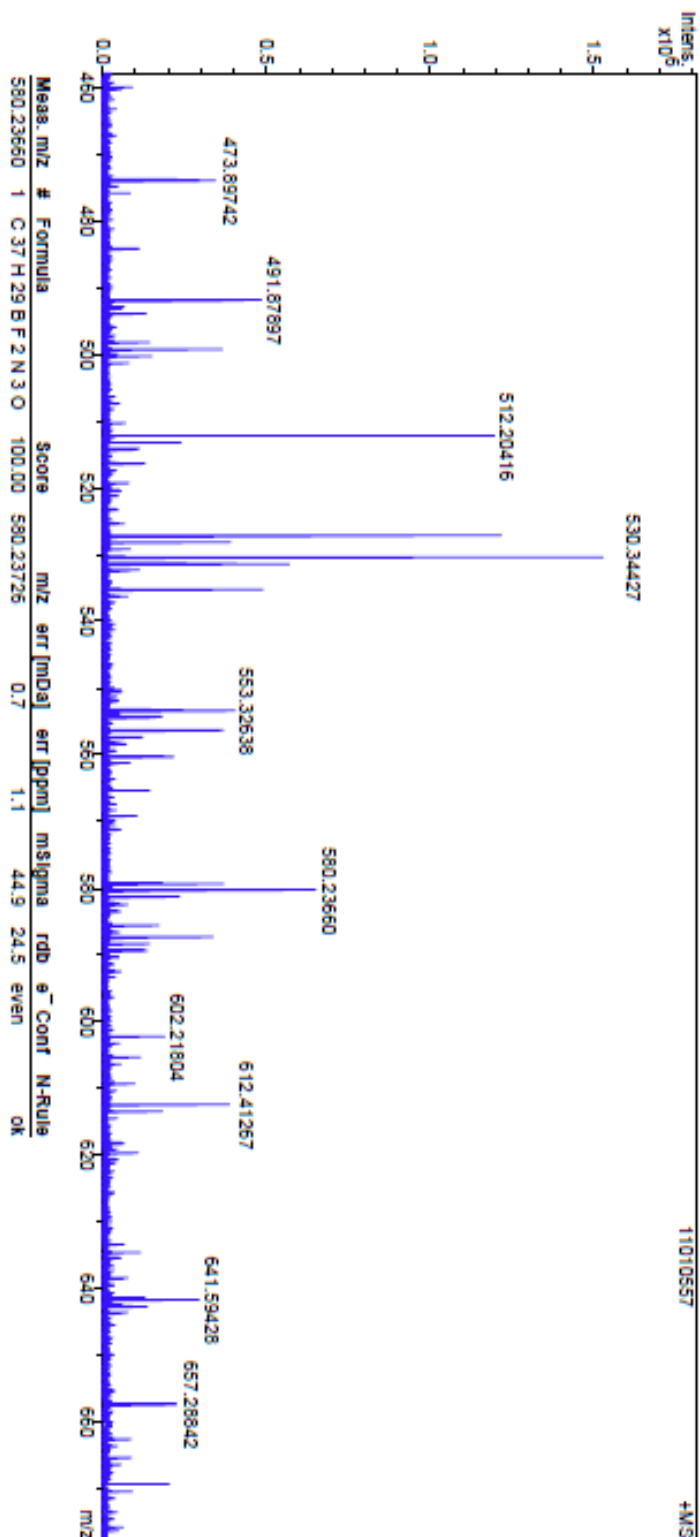

Bruker Compass DataAnalysis 4.0

printed:

Page 1 of 1

## 5. HRMS

HRMS of 3a

# Peking University Mass Spectrometry Sample Analysis Report

## Analysis Info

Analysis Name 11010657  
Sample  
Comment ESI Positive

Acquisition Date

Instrument  
Operator

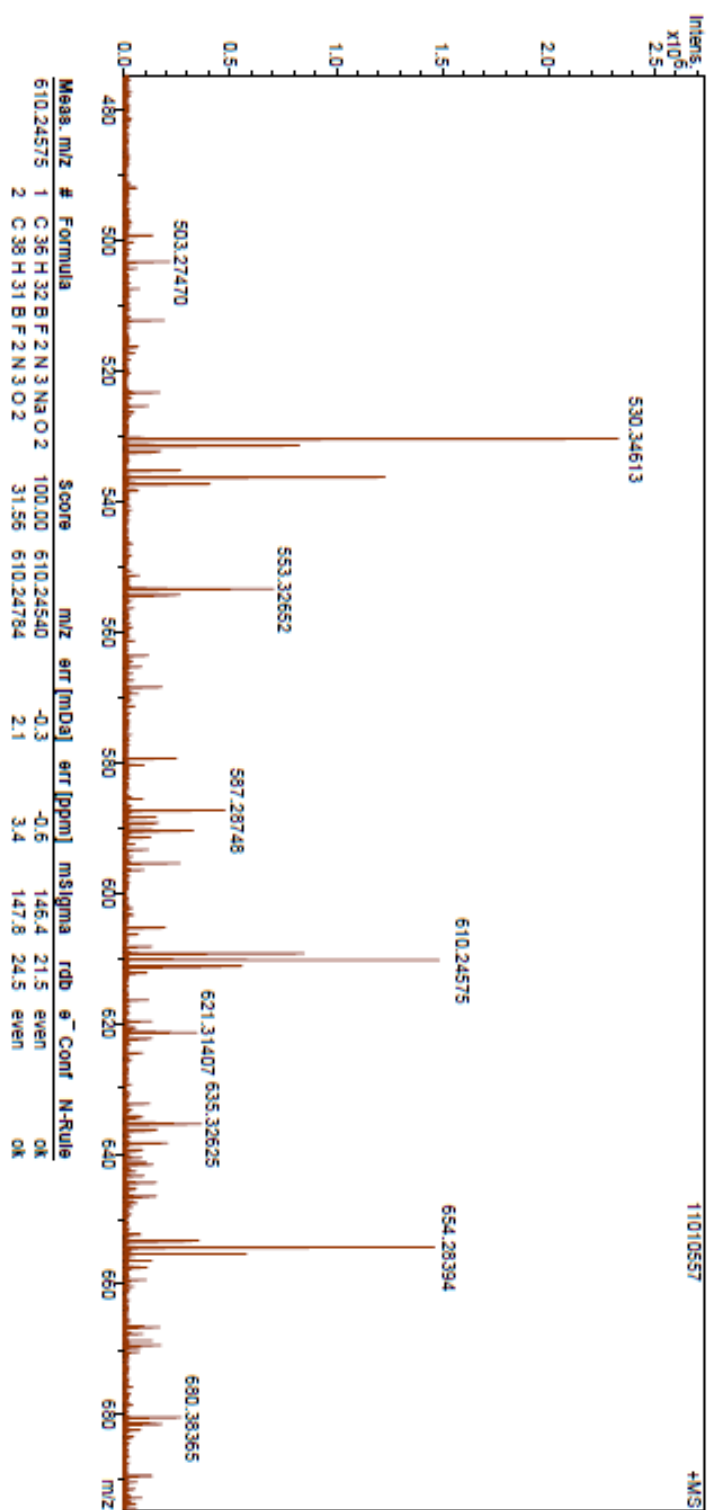

## 6. References

- 1 A. Gorman, J. Killoran, C. O'Shea, T. Kenna, W. M. Gallagher and D. F. O'Shea, *J. Am. Chem. Soc.*, 2004, **126**, 10619.
- 2 Frisch, M. J.; Trucks, G. W.; Schlegel, H. B.; Scuseria, G. E.; Robb, M. A.; Cheeseman, J. R.; Montgomery, J. A., Jr.; Vreven, T.; Kudin, K. N.; Burant, J. C.; Millam, J. M.; Iyengar, S. S.; Tomasi, J.; Barone, V.; Mennucci, B.; Cossi, M.; Scalmani, G.; Rega, N.; Petersson, G. A.; Nakatsuji, H.; Hada, M.; Ehara, M.; Toyota, K.; Fukuda, R.; Hasegawa, J.; Ishida, M.; Nakajima, T.; Honda, Y.; Kitao, O.; Nakai, H.; Klene, M.; Li, X.; Knox, J. E.; Hratchian, H. P.; Cross, J. B.; Adamo, C.; Jaramillo, J.; Gomperts, R.; Stratmann, R. E.; Yazyev, O.; Austin, A. J.; Cammi, R.; Pomelli, C.; Ochterski, J. W.; Ayala, P. Y.; Morokuma, K.; Voth, G. A.; Salvador, P.; Dannenberg, J. J.; Zakrzewski, V. G.; Dapprich, S.; Daniels, A. D.; Strain, M. C.; Farkas, O.; Malick, D. K.; Rabuck, A. D.; Raghavachari, K.; Foresman, J. B.; Ortiz, J. V.; Cui, Q.; Baboul, A. G.; Clifford, S.; Cioslowski, J.; Stefanov, B. B.; Liu, G.; Liashenko, A.; Piskorz, P.; Komaromi, I.; Martin, R. L.; Fox, D. J.; Keith, T.; Al-Laham, M. A.; Peng, C. Y.; Nanayakkara, A.; Challacombe, M.; Gill, P. M. W.; Johnson, B.; Chen, W.; Wong, M. W.; Gonzalez, C.; Pople, J. A.; Gaussian, Inc.: Pittsburgh, PA, 2003.
- 3 H. KnoÈlker, B. Ahrens, P. Gonser, M. Heininger and P. G. Jones, *Tetrahedron*, 2000, **56**, 2259.
- 4 X.-D. Jiang, J. Zhang, X. Shao and W. Zhao, *Org. Biomol. Chem.*, 2012, **10**, 1966.
